# Supplementary material
Source: ML conference proceedings conference paper supplement (https://openreview.net/forum?id=pEUBqS8nTk)
Supplement: supplementary_material [file 2806_Supp.pdf › 2806_Supp_Mat/2806_Supp.pdf]

# Towards Physics-informed Visual-Spatial Intelligence with Human Priors: An Autonomous Driving Study

## Supplementary Material

### Contents

|          |                                                         |           |
|----------|---------------------------------------------------------|-----------|
| <b>A</b> | <b>Evaluation Metrics</b>                               | <b>2</b>  |
| A.1      | Multi-level Spatial Matching . . . . .                  | 2         |
| A.2      | Spatial Relation Graph Similarity . . . . .             | 2         |
| A.3      | Semantic Relational Distance . . . . .                  | 3         |
| <b>B</b> | <b>SIG Benchmark</b>                                    | <b>3</b>  |
| B.1      | Overview . . . . .                                      | 3         |
| B.2      | Benchmark Annotation . . . . .                          | 3         |
| B.3      | Models for Experiment . . . . .                         | 3         |
| <b>C</b> | <b>SIGBench Task Examples</b>                           | <b>5</b>  |
| C.1      | Spatial Intelligence Grid Creation . . . . .            | 5         |
| C.2      | Spatial Relation Paragraph Filling . . . . .            | 7         |
| C.3      | Gaze Prediction . . . . .                               | 8         |
| C.4      | Human-like Spatial Intelligence Grid Creation . . . . . | 10        |
| C.5      | Human-like Spatial Relation Paragraph Filling . . . . . | 12        |
| <b>D</b> | <b>Limitations</b>                                      | <b>13</b> |

564 The anonymous GitHub repo for this paper is at: [https://anonymous.4open.science/](https://anonymous.4open.science/r/SIGBench_code-1092)  
 565 r/SIGBench\_code-1092. SIGBench Tiny dataset: [https://figshare.com/s/](https://figshare.com/s/1dd411221a1cbad6eb3a)  
 566 1dd411221a1cbad6eb3a.

## 567 A Evaluation Metrics

### 568 A.1 Multi-level Spatial Matching

569 Let  $\alpha \in [1, \dots, n]$  denote  $n$  thresholds based on euclidean distance, we can calculate

$$P_\alpha = \frac{TP_\alpha}{TP_\alpha + FP_\alpha}, R_\alpha = \frac{TP_\alpha}{TP_\alpha + FN_\alpha}, \text{AssA}_\alpha = \frac{TP_\alpha}{TP_\alpha + FP_{\alpha_k} + FN_{\alpha_k}}. \quad (8)$$

570 Then, we normalize each of them through  $n$  thresholds

$$P = \frac{1}{n} \sum_{\alpha=1}^n P_\alpha, R = \frac{1}{n} \sum_{\alpha=1}^n R_\alpha, F1 = \frac{2PR}{P+R}, \text{AssA} = \frac{1}{n} \sum_{\alpha=1}^n \text{AssA}_\alpha \quad (9)$$

### 571 A.2 Spatial Relation Graph Similarity

572 For the calculation of spatial relation graph similarity, we have two main parts: the node edit distance  
 573  $D_N(\mathcal{G}, \hat{\mathcal{G}})$  and edge edit distance  $D_E(\mathcal{G}, \hat{\mathcal{G}})$ . The node edit distance  $D_N(\mathcal{G}, \hat{\mathcal{G}})$  includes substitution  
 574 cost  $\delta_{\text{sub}}(v_i, \hat{v}_{i'})$ , deletion cost  $\delta_{\text{del}}(v_i)$  and insertion cost  $\delta_{\text{ins}}(\hat{v}_j)$ . Let  $d_{v_i, v_{i'}}^N$  denotes the euclidean  
 575 distance between the position of node  $v_i$  and  $v_{i'}$  on SIG and  $\lambda_N$  as the total edit distance for the  
 576 unmatch of node attributes (e.g. color, type and order). The detailed formulas for each cost can be  
 577 shown as

$$\delta_{\text{sub}}(v_i, \hat{v}_{i'}) = \begin{cases} d_{v_i, v_{i'}}^N + \lambda_N \mathbb{I}[\text{attr}(v_i) \neq \text{attr}(\hat{v}_{i'})], & \text{if } (v_i, \hat{v}_{i'}) \in \mathcal{M}, \\ 0, & \text{otherwise.} \end{cases} \quad (10)$$

$$\delta_{\text{del}}(\hat{v}_i) = \begin{cases} \eta_{\text{del}}^N, & \text{if } \hat{v}_i \notin \{v \mid (v, \hat{v}) \in \mathcal{M}\}, \\ 0, & \text{otherwise.} \end{cases} \quad (11)$$

$$\delta_{\text{ins}}(v_j) = \begin{cases} \eta_{\text{ins}}^N, & \text{if } v_j \notin \{v \mid (v, \hat{v}) \in \mathcal{M}\}, \\ 0, & \text{otherwise.} \end{cases} \quad (12)$$

$$(13)$$

578 where  $\eta_{\text{del}}^N, \eta_{\text{ins}}^N$  are the cost for node insertion and deletion. For the edge edit distance  $D_E(\mathcal{G}, \hat{\mathcal{G}})$ ,  
 579 it includes edge substitution cost  $\delta_{\text{sub}}^E(e_i, \hat{e}_{i'})$ , edge deletion cost  $\delta_{\text{del}}^E(\hat{e}_i)$ , and edge insertion cost  
 580  $\delta_{\text{ins}}^E(e_j)$ . Let  $d_{e_i, e_{i'}}^E$  denotes the length between edge  $e_i$  and  $e_{i'}$  and  $\lambda_E$  as the total edit distance for  
 581 the unmatch of edge attributes (e.g. direction).

$$\delta_{\text{sub}}^E(e_i, \hat{e}_{i'}) = \begin{cases} d_{e_i, e_{i'}}^E + \lambda_E \mathbb{I}[\text{attr}(e_i) \neq \text{attr}(\hat{e}_{i'})], & \text{if } (e_i, \hat{e}_{i'}) \in \mathcal{M}_E, \\ 0, & \text{otherwise.} \end{cases} \quad (14)$$

$$\delta_{\text{del}}^E(\hat{e}_i) = \begin{cases} \eta_{\text{del}}^E, & \text{if } \hat{e}_i \notin \{e \mid (e, \hat{e}) \in \mathcal{M}_E\}, \\ 0, & \text{otherwise.} \end{cases} \quad (15)$$

$$\delta_{\text{ins}}^E(e_j) = \begin{cases} \eta_{\text{ins}}^E, & \text{if } e_j \notin \{e \mid (e, \hat{e}) \in \mathcal{M}_E\}, \\ 0, & \text{otherwise.} \end{cases} \quad (16)$$

582 where  $\eta_{\text{del}}^E, \eta_{\text{ins}}^E$  are the cost for edge insertion and deletion and  $\mathcal{M}_E$  is the set of matched edges based  
 583 on  $\mathcal{M}$ .

### 584 A.3 Semantic Relational Distance

585 Let  $\tilde{d}_i$  denote the signed distance (in steps) between the predicted and ground-truth preposition for  
 586 the  $i$ -th example. We can calculate MAE and MSE by

$$MAE = \frac{1}{n} \sum_{i=1}^n |\tilde{d}_i| \quad MSE = \frac{1}{n} \sum_{i=1}^n |\tilde{d}_i|^2. \quad (17)$$

## 587 B SIG Benchmark

### 588 B.1 Overview

589 We introduce SIGBench, a benchmark for quantifying both grid-based and human-like VSI in  
 590 MLLMs within AD scenario. SIGBench comprises 1,423 frames, each annotated with (i) SIG  
 591 and human-like SIG, (ii) SRP and human-like SRP and (iii) a corresponding gaze attention map  
 592 in image size. All image sequences and raw gaze data are drawn from the U.S. Federal Highway  
 593 Administration driving dataset, which includes 49 driving sessions ( $\approx 65$  minutes each at 25 FPS)  
 594 recorded from 25 drivers, with gaze tracked by SmartEye Pro5. SIGBench contains two main parts:  
 595 grid-based VSI, containing tasks such as spatial intelligence grid creation (SIGC) and spatial relation  
 596 paragraph filling (SRPF) and human-like VSI, containing human-like SIGC and SRPF, and gaze  
 597 prediction.

### 598 B.2 Benchmark Annotation

599 We begin by filtering out frames with missing or erratic gaze data, retaining only those that have valid  
 600 gaze points in the current frame and the previous five frames. For each selected frame, we estimate a  
 601 circular attention radius  $r$  based on

$$r = \min(r_w, r_h) \quad \text{s.t.} \quad r_w = \frac{f \cdot I_w}{s_w} \cdot \tan\left(\frac{\text{fov}_w}{2}\right), \quad r_h = \frac{f \cdot I_h}{s_h} \cdot \tan\left(\frac{\text{fov}_h}{2}\right) \quad (18)$$

602 where  $f$  is the camera focal length,  $I_w, I_h$  are image width and height in pixels,  $s_w, s_h$  are the  
 603 corresponding sensor dimensions in millimeters, and  $\text{fov}_w$  and  $\text{fov}_h$  are the human horizontal and  
 604 vertical field of view. We then build the per-frame attention map  $A_{\text{Image}}^i$  by accumulating attention  
 605 map from frame  $i - 5$  to  $i$ . Next, we detect vehicles in each selected frame using Grounded-SAM-  
 606 2 [102] with the prompts “vehicles” and “trucks” with thresholds including: confidence  $\geq 0.28$ ,  
 607 bounding box area  $\geq 1900$  and text  $\geq 0.25$ . We then input the original image and vehicle bboxes into  
 608 Gemini-2.0-Flash and let it output JSON type files containing SIG. The prompt we use are shown in  
 609 Prompt. B.1. To correct spurious or missing labels, human annotators check and refine all annotated  
 610 SIG. For vehicles, we only keep those with valid bounding boxes and categorize each as one of four  
 611 types—truck, bus, car, or van—and assign a “color+type+order” label (*e.g.* black car 1), where order  
 612 runs leftmost to rightmost in the image. All traffic signs and lights that are clearly visible (*i.e.* not too  
 613 small or distant) are likewise annotated with “type+order” (*e.g.* sign 1, light 1).

### 614 B.3 Models for Experiment

615 For experiment on SIGBench, the detailed models we used are listed here. For open-source models:  
 616 InternVL family (InternVL-2.5-26B, InternVL-3-9B, InternVL-3-14B) [45], Qwen-VL family (Qwen-  
 617 VL-2.5-7B, Qwen-VL-2.5-32B) [40], LLaMA family (LLaMA-3.2-11B-Vision-Instruct) [42] and  
 618 DeepSeek-VL family (DeepSeek-VL, DeepSeek-VL-2-Tiny, DeepSeek-VL-2-Small) [43]. However,  
 619 since LLaMA-3.2-11B-Vision-Instruct and DeepSeek-VL models cannot correctly output JSON  
 620 type file for SIG creation after several prompt engineering, we cannot record their performance. For  
 621 proprietary models, we evaluate the performance of OpenAI GPT family (GPT-4o-mini, GPT-4o) [39],  
 622 Google Gemini family (Gemini-1.5-Pro, Gemini-2.0-Flash, Gemini-2.5-Pro) [41] and Anthropic  
 623 Claude family (Claude-3.7-Haiku, Claude-3.7-Sonnet) [44].

### Prompt B.1: Initial SIG Annotation using Gemini

[Task Summary] The first image captures an outdoor driving scene, and the second image is the same scene with bounding boxes on certain vehicles. Please identify vehicles, traffic lanes, traffic signs, and traffic lights within the image, and understand the spatial arrangement of these entities. Specifically, assuming the bird's eye view of the scene is represented by a 10x10 grid, please estimate the center position of these entities within this grid. The output is expected to be a JSON file containing a dictionary.

[Task Details] <Overall> 1. The first image captures an outdoor driving scene, and the second image is the same scene but only with bounding boxes on certain vehicles. 2. Estimate the center positions of each instance within the first image, assuming the entire scene is represented by a 10x10 bird's eye view grid. 3. The entities to be estimated include: vehicles, traffic lanes, traffic signs, traffic lights, and the vehicle that capture the images (self). 4. Both the horizontal and vertical coordinates of the grid range from 0 to 9, so all estimated positions (e.g., [x\_1, y\_1]) must fall within this range. 5. Estimated location of each instance should accurately reflect its real position in the scene, preserving the relative spatial relationships among all objects. 6. Please be aware of the front-backward or left-right relationship between instances, as there will be partial occlusion. 7. Since it is a bird's eye view grid, for all instances, more far away objects should be placed in the higher row number and the closer objects should be placed in the lower row number. <Vehicles> 1. Detect vehicles in the first image that are enclosed by bounding boxes in the second image only, and estimate the center positions of these enclosed vehicles within the grid. 2. The output is a key-value pair, which is expected to be exactly like: "vehicles": {"black car 1": [x\_1, y\_1], "gray truck 2": [x\_2, y\_2], ...}, where each vehicle instance is named by color, vehicle type, and order. 3. The color of vehicles are summarized into: gray, black, white, silver, blue, green, yellow, red, purple. Other colors need to be attributed to the one closest to it among these colors. 4. The type of vehicles here are summarized into four category: car(including suv), truck(including pickup truck), van, and bus. 5. The order of vehicles is decided exactly from left to right of each vehicle in the first image, the left most vehicle is 1, the second left most vehicle is 2, etc. <Traffic lanes> 1. Detect all traffic lanes of the same direction of the vehicle that captures the image in the first image, and estimate the lane position within the grid. One lane can be represented by multiple adjacent points as it is long. 2. The output is a key-value pair, which is expected to be exactly like: "traffic\_lanes": {"lane 1": [[x\_11, y\_11], [x\_12, y\_12], ...], "lane 2": [[x\_21, y\_21], [x\_22, y\_22], ...], ...}, where each lane is named by order. 3. The order of lanes is decided exactly from left to right of each lane in the first image, the left most lane is 1, the second left most lane is 2, etc. <Traffic signs> 1. Detect all traffic signs in the first image, and estimate the center positions of these traffic signs. 2. The output is a key-value pair, which is expected to be exactly like: "traffic\_signs": {"sign 1": [x\_1, y\_1], "sign 2": [x\_2, y\_2], ...}, where each sign is named by order. 3. The order of signs is decided exactly from left to right of each sign in the first image, the left most sign is 1, the second left most sign is 2, etc. 4. If multiple signs are mounted on the same horizontal pole, please treat them as separate instances. <Traffic lights> 1. Detect all traffic lights in the first image, and estimate the center positions of these traffic lights. 2. The output is a key-value pair, which is expected to be exactly like: "traffic\_lights": {"light 1": [x\_1, y\_1], "light 2": [x\_2, y\_2], ...}, where each light is named by order. 3. The order of lights is decided exactly from left to right of each light in the first image, the left most light is 1, the second left most light is 2, etc. 4. If multiple traffic lights are mounted on the same horizontal pole, please treat them as one single light and use the midpoint between them as the center. <Self> 1. Estimate the center location of the vehicle that captures the image. 2. The output is expected to be exactly like: "self": [x, 0] 3. The vehicle capturing the image should be placed in the point with row index 0 and with column index depends on different images.

[Output] 1. Combine the key-value pairs of vehicles, traffic lanes, traffic signs and traffic lights into one dictionary, as final output. 2. The final output dictionary is expected to be exactly like: {"vehicles": {"black car 1": [x\_1, y\_1], "gray truck 2": [x\_2, y\_2], ...}, "traffic\_lanes": {"lane 1": [[x\_11, y\_11], [x\_12, y\_12], ...], "lane 2": [[x\_21, y\_21], [x\_22, y\_22], ...], ...}, "traffic\_signs": {"sign 1": [x\_1, y\_1], "sign 2": [x\_2, y\_2], ...}, "traffic\_lights": {"light 1": [x\_1, y\_1], "light 2": [x\_2, y\_2], ...}, "self": [x, 0] } 3. Only output the final dictionary as a JSON file.

## C SIGBench Task Examples

In this section, we provide the prompt we used for tasks including spatial intelligence grid creation (SIGC) (Sec. C.1), Spatial Relation Paragraph Filling (SRPF) (Sec. C.2), Gaze prediction (Sec. C.3), human-like SIGC (Sec. C.4) and human-like SRPF (Sec. C.5). Since different models need slight modification to correctly output the format we want, here we only provide some of them for illustration.

### C.1 Spatial Intelligence Grid Creation

#### Prompt C.1: SIGC Example General

Q: [SIGC task prompt] + [Original Image] + [Original Image with bbox of vehicles].

A: {"vehicles":{"white car 1":[5,3],"gray truck 2":[4,2],"yellow truck 3":[7,1]},"traffic\_lanes":{"lane 1":[[3,0],[3,2]],"lane 2":[[4,1],[4,7]],"lane 3":[[5,0],[5,1]]},"traffic\_signs":{"sign 1":[3,3],"sign 2":[8,1]},"traffic\_lights":{"light 1":[6,1],"light 2":[5,2]},"self":[4,0]}.

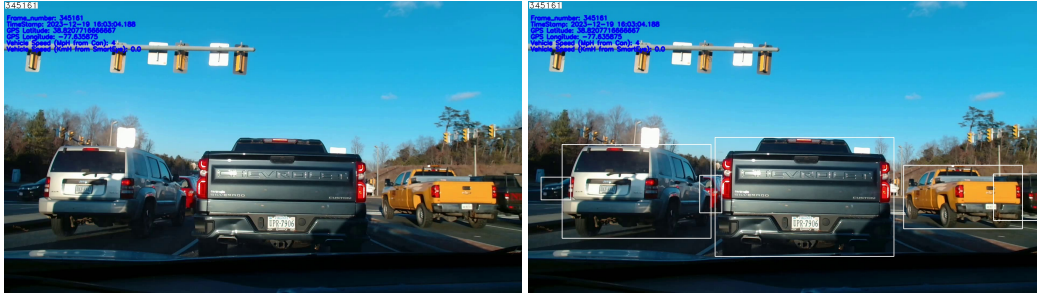

(a) Original image

(b) Image with bbox of vehicles

Figure 7: Example of input images for SIGC task

For SIGC, the general structure of this task is shown as Prompt. C.1. The detailed prompt we input is shown in Prompt. C.2. The original image and image with bbox of vehicles are shown in Fig. 7a and Fig. 7b, respectively. The visualization of predicted SIG output by GPT-4o for this image is shown in Fig. 8a and GT SIG is shown in Fig. 8b.

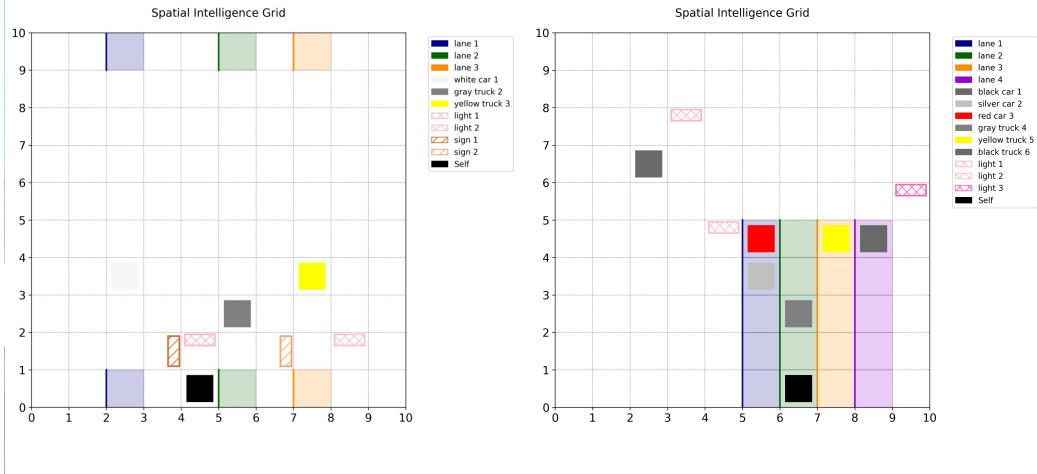

(a) Visualization of predicted SIG

(b) Visualization of GT SIG

Figure 8: Visualization of predicted SIG and GT SIG

## Prompt C.2: SIGC Prompt Example

[Task Summary] The first image captures an outdoor driving scene, and the second image is the same scene with bounding boxes on certain vehicles. Please identify vehicles, traffic lanes, traffic signs, and traffic lights within the image, and understand the spatial arrangement of these entities. Specifically, assuming the bird's eye view of the scene is represented by a 10\*10 grid, please estimate the center position of these entities within this grid. The output is expected to be a JSON file containing a dictionary.

[Task Details] <Overall> 1. The first image captures an outdoor driving scene, and the second image is the same scene but only with bounding boxes on certain vehicles. 2. Estimate the center positions of each instance within the first image, assuming the entire scene is represented by a 10\*10 bird's eye view grid. 3. The entities to be estimated include: vehicles, traffic lanes, traffic signs, traffic lights, and the vehicle that capture the images (self). 4. Both the horizontal and vertical coordinates of the grid range from 0 to 9, so all estimated positions (e.g., [x\_1, y\_1]) must fall within this range. 5. Estimated location of each instance should accurately reflect its real position in the scene, preserving the relative spatial relationships among all objects. 6. Please be aware of the front-backward or left-right relationship between instances, as there will be partial occlusion. 7. Since it is a bird's eye view grid, for all instances, more far away objects should be placed in the higher row number and the closer objects should be placed in the lower row number. <Vehicles> 1. Detect vehicles in the first image that are enclosed by bounding boxes in the second image only, and estimate the center positions of these enclosed vehicles within the grid. 2. The output is a key-value pair, which is expected to be exactly like: "vehicles": {"black car 1": [x\_1, y\_1], "gray truck 2": [x\_2, y\_2], "yellow bus 3": [x\_3, y\_3], "blue van 4": [x\_4, y\_4], ...}, where each vehicle instance is named by color, vehicle type, and order. 3. The color of vehicles are summarized into: gray, black, white, silver, blue, green, yellow, red, purple. Other colors need to be attributed to the one closest to it among these colors. 4. The type of vehicles must be classified into exactly four categories: "car" (which include sedans, hatchbacks, and suvs), "truck" (including pickup trucks), "van", and "bus". Do not use "suv" or any other subcategory names directly as a type. Instead, map them into one of the four allowed categories. 5. The order of vehicles must be assigned globally, based strictly on their horizontal position in the first image. The left-most vehicle in the image must be numbered "1", the second left-most vehicle must be numbered "2", and so on. This numbering should apply across all vehicles, without restarting for different colors or types. 6. Vehicles usually travel within traffic lanes, so the estimated position of a vehicle moving in the same direction as the "self" vehicle should typically fall within the coordinates of a corresponding lane. This does not apply to vehicles traveling in the other directions or that are stationary. <Traffic lanes> 1. Detect all traffic lanes in the same driving direction as the vehicle capturing the image, and estimate the lane position within the grid. One lane can be represented by multiple adjacent points as it is long. 2. The output is a key-value pair, which is expected to be exactly like: "traffic\_lanes": {"lane 1": [[x\_11, y\_11], [x\_12, y\_12], ...], "lane 2": [[x\_21, y\_21], [x\_22, y\_22], ...], ...}, where each lane is named by order. 3. The order of traffic lanes is based strictly on their horizontal position in the first image. The left-most lane in the image must be numbered "1", the second left-most lane must be numbered "2", and so on. 4. Each lane is typically straight, so the horizontal coordinates of its points should usually be the same, forming a vertical line in the grid, unless the lane is clearly turning, merging, or splitting. 5. Additionally, adjacent lanes are typically close together, so their horizontal coordinate values of adjacent lanes should usually differ by only 1. <Traffic signs> 1. Detect all traffic signs in the first image, and estimate the center positions of these traffic signs. 2. The output is a key-value pair, which is expected to be exactly like: "traffic\_signs": {"sign 1": [x\_1, y\_1], "sign 2": [x\_2, y\_2], ...}, where each sign is named by order. 3. The order of traffic signs is based strictly on their horizontal position in the first image. The left-most sign in the image must be numbered "1", the second left-most sign must be numbered "2", and so on. 4. If multiple signs are mounted on the same horizontal pole, please treat them as separate instances. <Traffic lights> 1. Detect all traffic lights in the first image, and estimate the center positions of these traffic lights. 2. The output is a key-value pair, which is expected to be exactly like: "traffic\_lights": {"light 1": [x\_1, y\_1], "light 2": [x\_2, y\_2], ...}, where each light is named by order. 3. The order of traffic lights is based strictly on their horizontal position in the first image. The left-most light in the image must be numbered "1", the second left-most light must be numbered "2", and so on. 4. If multiple traffic lights are mounted on the same horizontal pole, please treat them as one single light and use the midpoint between them as the center. <Self> 1. Estimate the center location of the vehicle that captures the image. 2. The output is expected to be exactly like: "self": [x, 0]. 3. The vehicle capturing the image should be placed in the point with row index 0 and with column index depends on different images.

[Output] 1. Combine the key-value pairs of vehicles, traffic lanes, traffic signs and traffic lights into one dictionary, as final output. 2. The final output dictionary is expected to be exactly like: {"vehicles": {"black car 1": [x\_1, y\_1], "gray truck 2": [x\_2, y\_2], "yellow bus 3": [x\_3, y\_3], "blue van 4": [x\_4, y\_4], ...}, "traffic\_lanes": {"lane 1": [[x\_11, y\_11], [x\_12, y\_12], ...], "lane 2": [[x\_21, y\_21], [x\_22, y\_22], ...], ...}, "traffic\_signs": {"sign 1": [x\_1, y\_1], "sign 2": [x\_2, y\_2], ...}, "traffic\_lights": {"light 1": [x\_1, y\_1], "light 2": [x\_2, y\_2], ...}, "self": [x, 0] } 3. Please output the final dictionary in pure JSON format, without any additional text or explanation before or after. 4. All keys and string values in the output dictionary must be in lowercase letters only.

## 638 C.2 Spatial Relation Paragraph Filling

### Prompt C.3: SRPF Example General

Q: [SRPF task prompt] + [Original Image] + [Original Image with bbox of vehicles] + [Directional Relation Paragraph Template] + [Proximal Relation Paragraph Template].  
A: { "answers\_directional": [2, 2, 4, 4, 4, 4, 4, 2, 4, 4, 4, 4, 4, 4, 4, 4, 4, 4, 6, 4, 4, 4, 4, 4, 4, 4, 4, 4],  
"answers\_proximal": [0, 0, 1, 1, 1, 2, 2, 2, 0, 1, 1, 1, 2, 2, 2, 1, 1, 1, 2, 2, 2, 1, 1, 2, 2, 2, 1, 1, 2, 2, 2, 2, 2, 2] }.

639

640 For SRPF, the general structure of this task is shown as Prompt. C.3. The output answer is corre-  
641 sponding to the index of DIRECTIONAL\_LABELS = ["at the back of", "at the back left of", "at the  
642 left of", "at the front left of", "at the front of", "at the front right of", "at the right of", "at the back  
643 right of"] and PROXIMAL\_LABELS = ["adjacent to", "close to", "at a distance", "far from", "far  
644 away from"]. The detailed prompt we input is shown in Prompt. C.4. The original image and image  
645 with bbox of vehicles are shown in Fig. 7a and Fig. 7b, respectively.

### Prompt C.4: SRPF Prompt Example

[Input Description] You will be provided with two images and two incomplete text paragraphs. 1. The first image shows a real-world driving scene. 2. The second image is the same scene with bounding boxes drawn on several vehicles. 3. The first paragraph is a Directional Template that describes the directional relationships between certain vehicles, traffic signs, or traffic lights, using [directional preposition] as placeholders. Example: "Black car 1 is [directional preposition] white truck 2. Black car 1 is [directional preposition] sign 1." 4. The second paragraph is a Proximal Template that describes spatial proximity relationships (e.g., near/far) between the same entities, using [proximal preposition] as placeholders. Example: "Black car 1 is [proximal preposition] white truck 2. Black car 1 is [proximal preposition] sign 1." 5. The numbers of placeholders in the above two paragraphs are the same, as they describe relationships for the same entities. 6. The number in each object name (e.g., black car 1, sign 2) indicates its horizontal left-to-right order in the image among entities of the same type. For vehicles, the order is based on all boxed vehicles in the second image. For signs and traffic lights, the order is based on their horizontal position in the image (from either image).

[Task and Requirements] 1. Based on the provided images and templates, predict a label INDEX (NOT the label string) from the following label lists for each [directional preposition] and [proximal preposition] placeholder. DIRECTIONAL\_LABELS = ["at the back of", "at the back left of", "at the left of", "at the front left of", "at the front of", "at the front right of", "at the right of", "at the back right of"] PROXIMAL\_LABELS = ["adjacent to", "close to", "at a distance", "far from", "far away from"] 2. Please output two integer lists: 'answers\_directional' and 'answers\_proximal' in a json format, where each entry is the index of the selected label from the provided label list. Output example: { { "answers\_directional": [4, 7, ..., 1], "answers\_proximal": [2, 4, ..., 0] } } 3. The list answers\_directional must contain only integer indices ranging from 0 to 7 (inclusive), and answers\_proximal must contain indices from 0 to 4 (inclusive), as each index corresponds to a valid entry from the DIRECTIONAL\_LABELS and PROXIMAL\_LABELS lists, respectively. 4. The length of the answer lists must exactly match the number of [directional preposition] or [proximal preposition] placeholders in its respective template. This number will be explicitly provided to you along with the templates for each data example. 5. Do not provide explanations. Return only the two answer lists. 6. In some driving scenes, there may be no detectable entities, in which case both templates will contain only a single period ".". When this occurs, you should simply return two empty lists. The following are the two incomplete text paragraphs of this inference: [Directional Template] {template\_directional} [Proximal Template] {template\_proximal} The lists 'answers\_directional' and 'answers\_proximal' you return must each have EXACTLY {num\_placeholders} entries. 'answers\_directional' must contain ONLY INTEGERS FROM 0 to 7, and 'answers\_proximal' must contain ONLY INTEGERS FROM 0 to 4. Do not use quotation marks around the numbers — all entries must be returned as raw INTEGERS, NOT STRINGS.

646

### 647 C.3 Gaze Prediction

648 For gaze prediction, the general structure of this task is shown as Prompt. C.6. The detailed prompt  
 649 we input is shown in Prompt. C.5. The original image and image with bbox of vehicles are shown in  
 650 Fig. 7a and Fig. 7b, respectively. The output gaze attention map and gt attention map are shown in  
 651 Fig. 9.

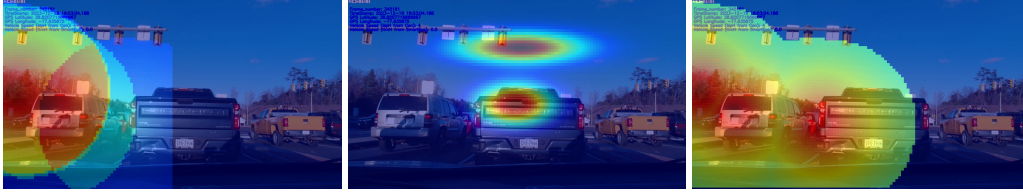

(a) Predicted human gaze attention map output by GPT-4o (b) Predicted human gaze attention map output by Gemini-2.5-Pro (c) GT human gaze attention map

Figure 9: Example of output attention maps for gaze prediction task

#### Prompt C.5: Gaze Prediction Prompt Example

You are an agent designed to predict the attention distribution of a human driver in the current driving scene, based on a real-time image and the gaze gray-scale from the previous 5 frames. Your prediction should reflect the driver’s visual attention in the current frame.

[Task Summary] Please predict the human driver’s attention on the current driving scene frame, based on the scene image and the driver’s attention on the previous five frames.

[Input] 1. The first 5 inputs are grayscale heatmaps of the driver’s attention on the previous 5 frames. Each has size (1080, 1920) and is downsampled by 16\*16 average pooling, so each 16\*16 patch contains the same value. 2. The 6th input is the full-resolution (1080, 1920) RGB image of the current driving scene. 3. Please consider the attention map from previous frames (the first five input images), and the content and their potential moving patterns in the current frame (the sixth input image), to make the best prediction on the driver’s attention on the current frame.

[Output] 1. The output array should have shape (1080, 1920), reflecting the driver’s visual attention on the current driving scene frame. 2. Please note that all values in the output array will be normalized into the range from 0 to 1, via Min-Max Normalization. 3. Instead of outputting the array directly, please generate a Python function that creates it using the code template below. Please output exactly in this format, ONLY modify the section between ‘# Modify here’ and ‘# End of modification’. 4. Code template: “python import numpy as np import cv2 def create\_attn\_map(previous\_attn\_list, current\_img):  
 attn\_map = np.zeros(current\_img.shape[:2], dtype=object) # Initialize the attention map # Modify here attn\_map = todo # End of modification return cv2.normalize(attn\_map, None, alpha=0, beta=1, norm\_type=cv2.NORM\_MINMAX, dtype=cv2.CV\_32F) # Normalize the attention map via Min-Max Normalization “ 5. In the code template, ‘previous\_attn\_maps’ is a np.array (with size(5, 1080, 1920)) of five attention maps corresponding to the previous five frames, and ‘current\_img’ is a np.array (with size (1080, 1920, 3)) of current driving scene image in BGR channel order.

[WARNING] 1. Output the entire Python function INDISE A MARKDOWN CODE BLOCK, starting with “python and ending with “”, as illustrated in the code template. Otherwise, the system will fail to extract your code and your output will be considered invalid. 2. DO NOT treat lists as NumPy arrays, they DON’T have attributes like ‘.astype’, ‘.shape’, ‘.dtype’, or ‘.size’. Convert them into np.array if you need to apply these attribute. If violated, the output will be considered invalid. 3. When using OpenCV functions such as cv2.add, cv2.addWeighted, cv2.subtract, etc., MAKE SURE the input arrays have the same data type (e.g., both float32 or both uint8). If necessary, use .astype(np.float32) to convert them before the operation. Otherwise, it will cause cv2.errors.

[Important Requirements] 1. The output function can only rely on the two arguments given in the code template. 2. Please try to use only methods from the NumPy and OpenCV libraries. 3. Please do not define any additional helper functions outside ‘create\_attn\_map’. 4. Please ensure that the code is syntactically correct, bug-free, and ready to run without modifications; try to keep your function concise and refined. 5. Please output only the Python function, without any additional explanatory text. 6. Please do NOT use ‘cv2.saliency’ module, it may not be available. 7. Please do NOT assume any existence of external files, functions, or methods.

652

### Prompt C.6: Gaze Prediction Example General

Q: [Gaze Prediction Task Prompt] + [Python Code Template] + [Attention Map from Five Previous Frames] + [Original Image].

```
A:import numpy as np import cv2 def create_attn_map(previous_attn_list,
current_img): attn_map = np.zeros(current_img.shape[:2],
dtype=np.float32) # Initialize the attention map # Modify
here, assign value for 'attn_map' # Average the previous
attention maps avg_previous_attn = np.mean(previous_attn_list,
axis=0) # Focus on the road ahead and vehicles height, width
= current_img.shape[:2] road_region = current_img[height//2:,
:] road_gray = cv2.cvtColor(road_region, cv2.COLOR_BGR2GRAY) _,
road_mask = cv2.threshold(road_gray, 127, 1, cv2.THRESH_BINARY)
# Combine the averaged previous attention with the road mask
attn_map[height//2:, :] = avg_previous_attn[height//2:, :] *
road_mask # End of modification return cv2.normalize(attn_map, None,
alpha=0, beta=1, norm_type=cv2.NORM_MINMAX, dtype=cv2.CV_32F) #
Normalize the attention map via Min-Max Normalization.
```

653

654 After a close look at the results in gaze prediction output by different models, we found that the  
655 widely used metrics such as person's correlation coefficient, KL-Divergence and information gain  
656 (IG) might not be able to fully reveal the performance of different MLLMs for gaze prediction  
657 tasks in our settings (given attention map from five previous frames). The main insight for giving  
658 human gaze attention map from five previous frames is we want the model to predict the human gaze  
659 attention map for current frame. In addition, since human gaze follows high spatial-temporal property,  
660 the ground-truth (GT) human gaze attention map should be the accumulation of these human gaze  
661 attention maps from 5 previous frames and current frame. Based on the results shown in Tab. 4,  
662 Qwen-VL-2.5-7B and InternVL-2.5-26B achieves the best and second best performance in human  
663 gaze prediction task. However, the output code of Qwen-VL2.5-7B and InternVL2.5-26B are always  
664 taking the average of human gaze attention map from five previous frames and do no additional  
665 operations on it, shown as Prompt. C.7. We don't think current metrics for gaze prediction can  
666 disclose the true capability of MLLMs while based on other model's output such as using operations  
667 such as gaussian blue or edge detection is also far away from the true gaze prediction. Thus, we claim  
668 that the MLLMs we test in our experiment shows little capability in predicting human gaze attention.

### Prompt C.7: Qwen-VL2.5-7B Output for Gaze Prediction Example

```
import numpy as np import cv2 def create_attn_map(previous_attn_list,
current_img): attn_map = np.zeros(current_img.shape[:2],
dtype=np.float32) # Initialize the attention map # Modify
here for i in range(len(previous_attn_list)): attn_map +=
previous_attn_list[i] attn_map /= len(previous_attn_list) # End
of modification return cv2.normalize(attn_map, None, alpha=0,
beta=1, norm_type=cv2.NORM_MINMAX, dtype=cv2.CV_32F) # Normalize the
attention map via Min-Max Normalization
```

669

## 670 C.4 Human-like Spatial Intelligence Grid Creation

### Prompt C.8: Human-like SIGC Example General

Q: [Human-like SIGC task prompt] + [Original Image] + [Original Image with bbox of vehicles]

A: {"vehicles":{"white car 1":[2,3],"gray truck 2":[5,2],"yellow truck 3":[7,3]},"traffic\_lanes":{"lane 1":[[2,0],[2,9]],"lane 2":[[5,0],[5,9]],"lane 3":[[7,0],[7,9]]},"traffic\_signs":{"sign 1":[3,1],"sign 2":[6,1]},"traffic\_lights":{"light 1":[4,1],"light 2":[8,1]},"self":[4,0]}.

671

672 For human-like SIGC, it is similar to the task SIGC (Sec. C.1). The general structure of this task is  
 673 shown as Prompt. C.8. The detailed prompt we input is shown in Prompt. C.9. The original image and  
 674 image with bbox of vehicles are shown in Fig. 7a and Fig. 7b, respectively. The image size attention  
 675 map is shown in Fig. 10a and SIG size attention map transformed using homographic transformation  
 676 is shown in Fig. 10b. The attention weight of each object is the corresponding attention weight at  
 677 their position in SIG. During evaluation, these attention weight will be used to scale the punishment  
 678 of the incorrect prediction for different objects.

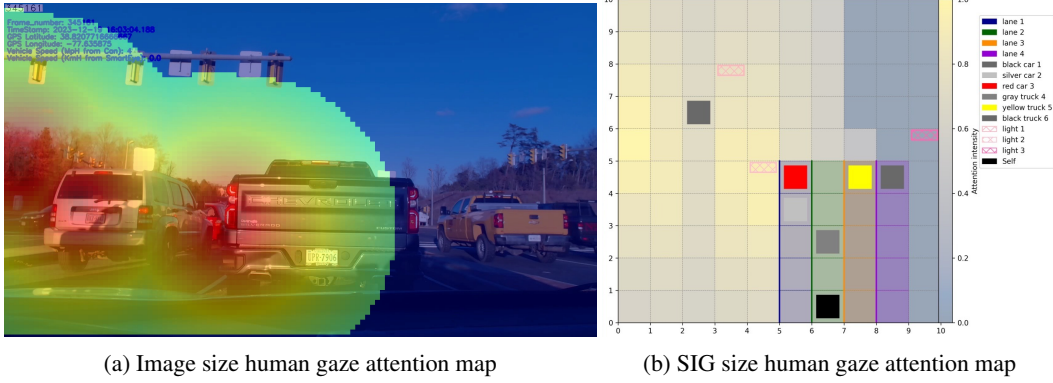

Figure 10: Example of image and SIG size human gaze attention map

### Prompt C.9: Human-like SIGC Prompt Example

[Task Summary] The first image captures an outdoor driving scene, and the second image is the same scene with bounding boxes on certain vehicles. Please identify vehicles, traffic lanes, traffic signs, and traffic lights within the image like a human, and understand the spatial arrangement of these entities. Specifically, assuming the bird's eye view of the scene is represented by a 10\*10 grid, please estimate the center position of these entities within this grid. The output is expected to be a JSON file containing a dictionary.

[Task Details] <Overall> 1. The first image captures an outdoor driving scene, and the second image is the same scene but only with bounding boxes on certain vehicles. 2. Estimate the center positions of each instance within the first image, assuming the entire scene is represented by a 10\*10 bird's eye view grid. 3. The entities to be estimated include: vehicles, traffic lanes, traffic signs, traffic lights, and the vehicle that capture the images (self). 4. Both the horizontal and vertical coordinates of the grid range from 0 to 9, so all estimated positions (e.g., [x\_1, y\_1]) must fall within this range. 5. Estimated location of each instance should accurately reflect its real position in the scene, preserving the relative spatial relationships among all objects. 6. Please be aware of the front-backward or left-right relationship between instances, as there will be partial occlusion. 7. Since it is a bird's eye view grid, for all instances, more far away objects should be placed in the higher row number and the closer objects should be placed in the lower row number. <Vehicles> 1. Detect vehicles in the first image that are enclosed by bounding boxes in the second image only, and estimate the center positions of these enclosed vehicles within the grid. 2. The output is a key-value pair, which is expected to be exactly like: "vehicles": {"black car 1": [x\_1, y\_1], "gray truck 2": [x\_2, y\_2], "yellow bus 3": [x\_3, y\_3], "blue van 4": [x\_4, y\_4], ...}, where each vehicle instance is named by color, vehicle type, and order. 3. The color of vehicles are summarized into: gray, black, white, silver, blue, green, yellow, red, purple. Other colors need to be attributed to the one closest to it among these colors. 4. The type of vehicles must be classified into exactly four categories: "car" (which include sedans, hatchbacks, and suvs), "truck" (including pickup trucks), "van", and "bus". Do not use "suv" or any other subcategory names directly as a type. Instead, map them into one of the four allowed categories. 5. The order of vehicles must be assigned globally, based strictly on their horizontal position in the first image. The left-most vehicle in the image must be numbered "1", the second left-most vehicle must be numbered "2", and so on. This numbering should apply across all vehicles, without restarting for different colors or types. 6. Vehicles usually travel within traffic lanes, so the estimated position of a vehicle moving in the same direction as the "self" vehicle should typically fall within the coordinates of a corresponding lane. This does not apply to vehicles traveling in the other directions or that are stationary. <Traffic lanes> 1. Detect all traffic lanes in the same driving direction as the vehicle capturing the image, and estimate the lane position within the grid. One lane can be represented by multiple adjacent points as it is long. 2. The output is a key-value pair, which is expected to be exactly like: "traffic\_lanes": {"lane 1": [[x\_11, y\_11], [x\_12, y\_12], ...], "lane 2": [[x\_21, y\_21], [x\_22, y\_22], ...], ...}, where each lane is named by order. 3. The order of traffic lanes is based strictly on their horizontal position in the first image. The left-most lane in the image must be numbered "1", the second left-most lane must be numbered "2", and so on. 4. Each lane is typically straight, so the horizontal coordinates of its points should usually be the same, forming a vertical line in the grid, unless the lane is clearly turning, merging, or splitting. 5. Additionally, adjacent lanes are typically close together, so their horizontal coordinate values of adjacent lanes should usually differ by only 1. <Traffic signs> 1. Detect all traffic signs in the first image, and estimate the center positions of these traffic signs. 2. The output is a key-value pair, which is expected to be exactly like: "traffic\_signs": {"sign 1": [x\_1, y\_1], "sign 2": [x\_2, y\_2], ...}, where each sign is named by order. 3. The order of traffic signs is based strictly on their horizontal position in the first image. The left-most sign in the image must be numbered "1", the second left-most sign must be numbered "2", and so on. 4. If multiple signs are mounted on the same horizontal pole, please treat them as separate instances. <Traffic lights> 1. Detect all traffic lights in the first image, and estimate the center positions of these traffic lights. 2. The output is a key-value pair, which is expected to be exactly like: "traffic\_lights": {"light 1": [x\_1, y\_1], "light 2": [x\_2, y\_2], ...}, where each light is named by order. 3. The order of traffic lights is based strictly on their horizontal position in the first image. The left-most light in the image must be numbered "1", the second left-most light must be numbered "2", and so on. 4. If multiple traffic lights are mounted on the same horizontal pole, please treat them as one single light and use the midpoint between them as the center. <Self> 1. Estimate the center location of the vehicle that captures the image. 2. The output is expected to be exactly like: "self": [x, 0]. 3. The vehicle capturing the image should be placed in the point with row index 0 and with column index depends on different images.

[Output] 1. Combine the key-value pairs of vehicles, traffic lanes, traffic signs and traffic lights into one dictionary, as final output. 2. The final output dictionary is expected to be exactly like: {"vehicles": {"black car 1": [x\_1, y\_1], "gray truck 2": [x\_2, y\_2], "yellow bus 3": [x\_3, y\_3], "blue van 4": [x\_4, y\_4], ...}, "traffic\_lanes": {"lane 1": [[x\_11, y\_11], [x\_12, y\_12], ...], "lane 2": [[x\_21, y\_21], [x\_22, y\_22], ...], ...}, "traffic\_signs": {"sign 1": [x\_1, y\_1], "sign 2": [x\_2, y\_2], ...}, "traffic\_lights": {"light 1": [x\_1, y\_1], "light 2": [x\_2, y\_2], ...}, "self": [x, 0] } 3. Please output the final dictionary in pure JSON format, without any additional text or explanation before or after. 4. All keys and string values in the output dictionary must be in lowercase letters only.

## 680 C.5 Human-like Spatial Relation Paragraph Filling

### Prompt C.10: Human-like SRPF Example General

Q: [SRPF task prompt] + [Original Image] + [Original Image with bbox of vehicles] + [Directional Relation Paragraph Template] + [Proximal Relation Paragraph Template].  
A: { "answers\_directional": [2, 2, 4, 4, 4, 4, 4, 4, 2, 4, 4, 4, 4, 4, 4, 4, 4, 4, 6, 4, 4, 4, 4, 4, 4, 4, 4, 4, 4, 4],  
"answers\_proximal": [0, 0, 1, 1, 1, 2, 2, 2, 0, 1, 1, 1, 2, 2, 2, 1, 1, 1, 2, 2, 2, 1, 1, 2, 2, 2, 1, 1, 2, 2, 2, 2, 2, 2] }.

681

682 For human-like SRPF, it is similar to the task SRPF (Sec. C.2). The general structure of this task  
683 is shown as Prompt. C.10. The detailed prompt we input is shown in Prompt. C.11. The original  
684 image and image with bbox of vehicles are shown in Fig. 7a and Fig. 7b, respectively. The image  
685 size attention map is shown in Fig. 10a and SIG size attention map transformed using homographic  
686 transformation is shown in Fig. 10b. The attention weight for each sentence between two objects  
687 would be the average of these two objects using their corresponding attention weight at their position  
688 in SIG.

### Prompt C.11: Human-like SRPF Prompt Example

[Input Description] You will be provided with two images and two incomplete text paragraphs, think as a human driver. 1. The first image shows a real-world driving scene. 2. The second image is the same scene with bounding boxes drawn on several vehicles. 3. The first paragraph is a Directional Template that describes the directional relationships between certain vehicles, traffic signs, or traffic lights, using [directional preposition] as placeholders. Example: "Black car 1 is [directional preposition] white truck 2. Black car 1 is [directional preposition] sign 1." 4. The second paragraph is a Proximal Template that describes spatial proximity relationships (e.g., near/far) between the same entities, using [proximal preposition] as placeholders. Example: "Black car 1 is [proximal preposition] white truck 2. Black car 1 is [proximal preposition] sign 1." 5. The numbers of placeholders in the above two paragraphs are the same, as they describe relationships for the same entities. 6. The number in each object name (e.g., black car 1, sign 2) indicates its horizontal left-to-right order in the image among entities of the same type. For vehicles, the order is based on all boxed vehicles in the second image. For signs and traffic lights, the order is based on their horizontal position in the image (from either image).  
[Task and Requirements] 1. Based on the provided images and templates, predict a label INDEX (NOT the label string) from the following label lists for each [directional preposition] and [proximal preposition] placeholder. DIRECTIONAL\_LABELS = ["at the back of", "at the back left of", "at the left of", "at the front left of", "at the front of", "at the front right of", "at the right of", "at the back right of"] PROXIMAL\_LABELS = ["adjacent to", "close to", "at a distance", "far from", "far away from"] 2. Please output two integer lists: 'answers\_directional' and 'answers\_proximal' in a json format, where each entry is the index of the selected label from the provided label list. Output example: { "answers\_directional": [4, 7, ..., 1], "answers\_proximal": [2, 4, ..., 0] } 3. The list answers\_directional must contain only integer indices ranging from 0 to 7 (inclusive), and answers\_proximal must contain indices from 0 to 4 (inclusive), as each index corresponds to a valid entry from the DIRECTIONAL\_LABELS and PROXIMAL\_LABELS lists, respectively. 4. The length of the answer lists must exactly match the number of [directional preposition] or [proximal preposition] placeholders in its respective template. This number will be explicitly provided to you along with the templates for each data example. 5. Do not provide explanations. Return only the two answer lists. 6. In some driving scenes, there may be no detectable entities, in which case both templates will contain only a single period ".". When this occurs, you should simply return two empty lists. The following are the two incomplete text paragraphs of this inference: [Directional Template] {template\_directional} [Proximal Template] {template\_proximal} The lists 'answers\_directional' and 'answers\_proximal' you return must each have EXACTLY {num\_placeholders} entries. 'answers\_directional' must contain ONLY INTEGERS FROM 0 to 7, and 'answers\_proximal' must contain ONLY INTEGERS FROM 0 to 4. Do not use quotation marks around the numbers — all entries must be returned as raw INTEGERS, NOT STRINGS.

689

## 690 **D Limitations**

691 One key limitation of our Spatial Intelligence Grid (SIG) is its reliance on an autonomous-  
692 driving-specific ontology, which precludes its direct applicability to truly open-world visual-spatial  
693 reasoning. Unlike conventional VQA-style representations—which flatten complex spatial relation-  
694 ships into isolated question-answer pairs—SIG preserves the structured, multi-object topology and  
695 relative geometry that underlie robust spatial understanding. Nonetheless, SIG represents only a first  
696 step toward a fully generalizable VSI framework. In future work, we will extend our approach to  
697 encompass a broader variety of scene types and object classes, with the goal of capturing open-world  
698 spatial relations in a unified, model-agnostic representation.
